# Supplementary material for: Breast cancer plasticity is restricted by a LATS1-NCOR1 repressive axis
Source: PubMed Central journal article supplement (PMC9705295; doi:10.1038/s41467-022-34863-9), 2022-11-28

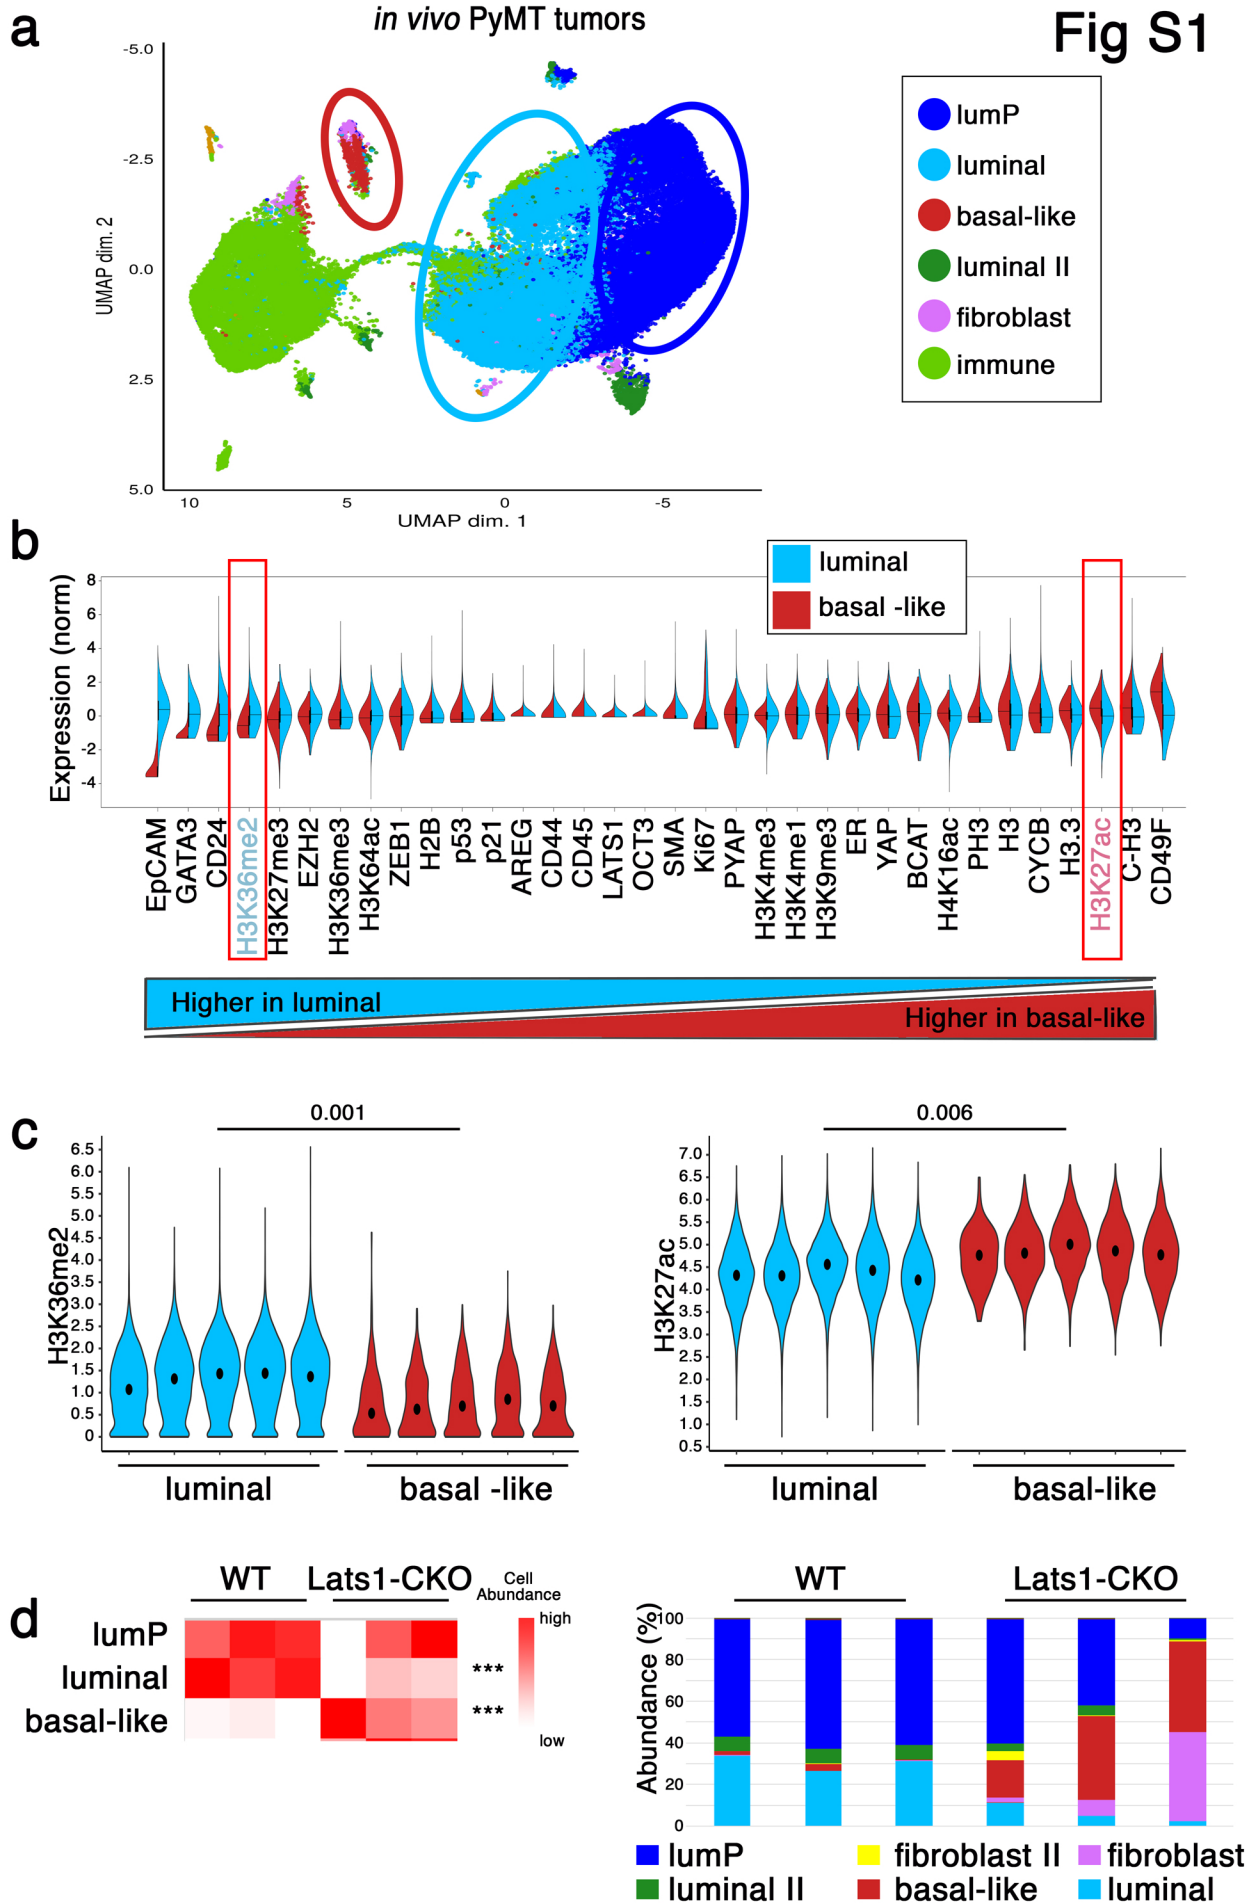

**Figure S1: Epigenetic features of PyMT tumors.** (a) Five WT PyMT tumors were dispersed into single cell suspensions and subjected to EpiTOF analysis as in Fig 1. (b) Luminal and basal-like subpopulations as defined in the EpiTOF analysis of *in vivo* tumor samples were compared. The expression of each of the markers was centered to have zero mean and is displayed in the form of a split violin plot ordered according to extent difference. Black lines designate medians. Red boxes denote H3K36me2 and H3K27ac. (c) Violin plot comparing mean expression levels of the indicated epigenetic marks in luminal vs basal-like *in vivo* EpiTOF subpopulations. Benjamini-Hochberg correction for multiple comparisons. (d) The relative abundance of cells in each subpopulation (within the total epithelial cell population) was compared in WT vs Lats1-CKO cells. Values were derived from EpiTOF data of WT and littermate matched Lats1-CKO tumor-derived cell lines and are presented as a heatmap (left panel), where darker red indicates a greater portion of the cells. Each column represents an independent cell line. Benjamini-Hochberg correction for multiple comparisons, \*\*\* p-value <0.01 within each subpopulation. In the right panel, the relative portion of each subpopulation is presented as a stacked bar graph, with each column representing an independent cell line of the indicated genotype. Source data are provided as a Source Data file.

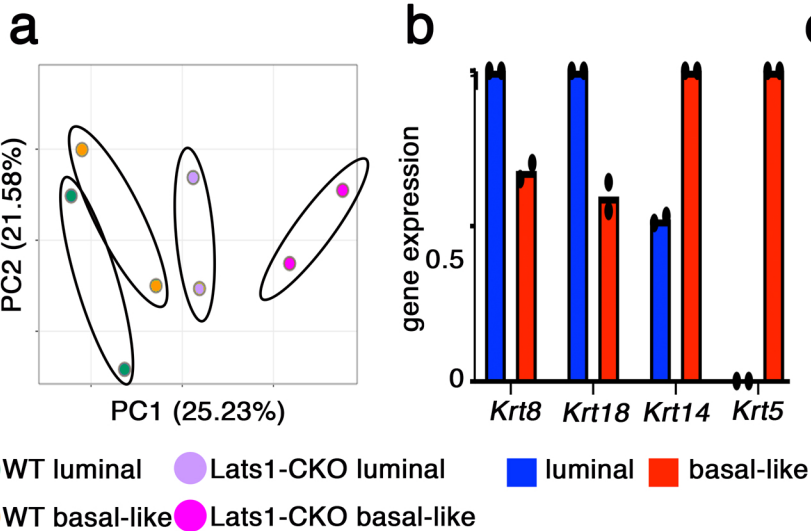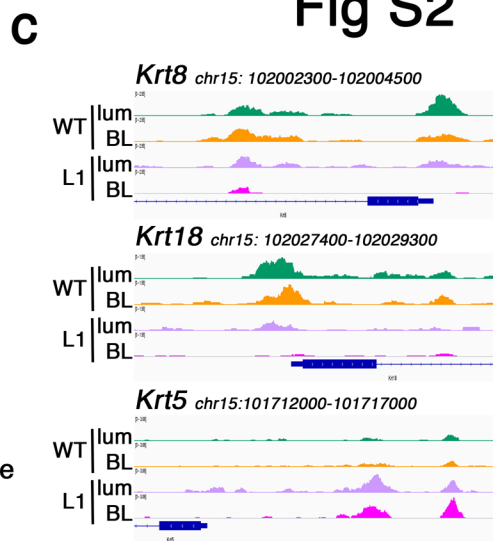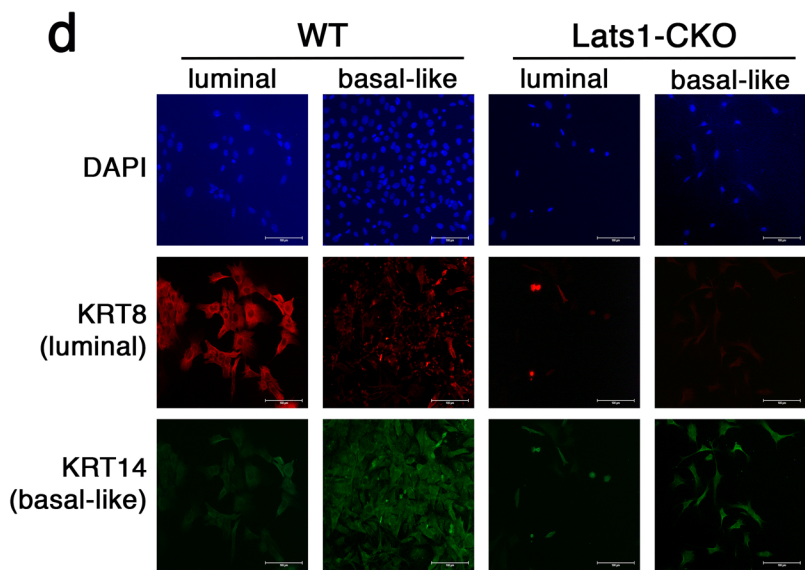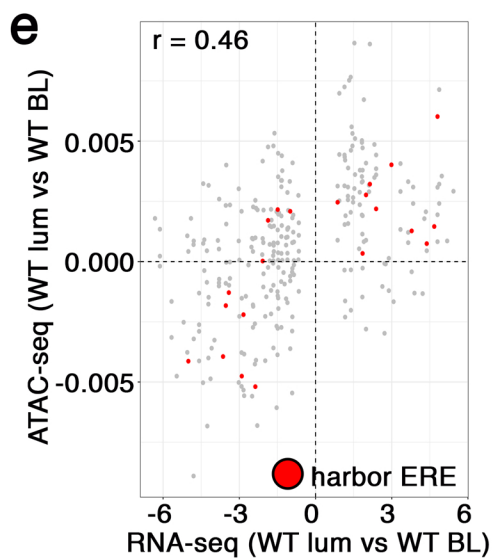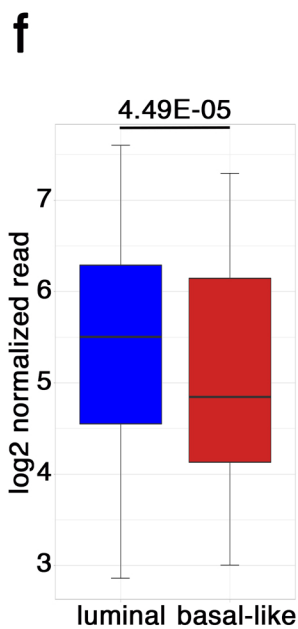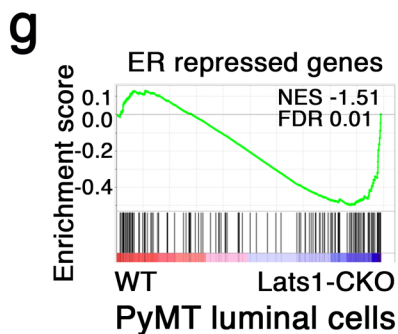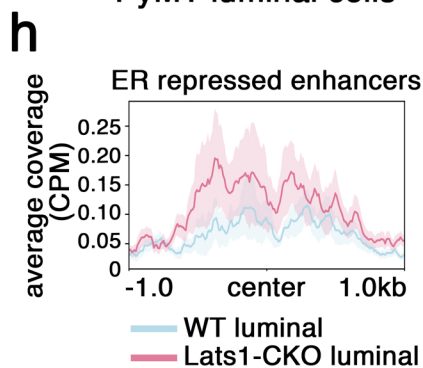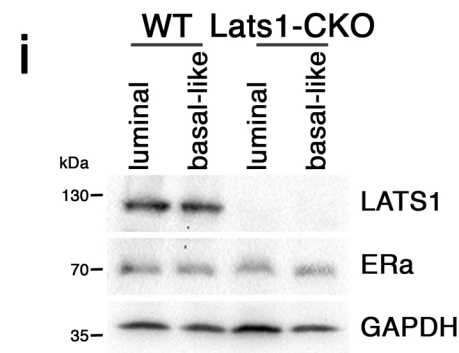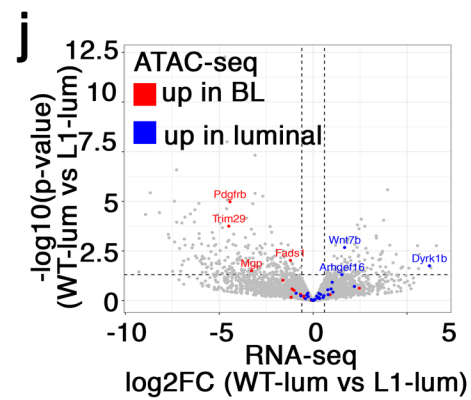

**Figure S2: Characterization of luminal and basal-like subpopulations.** (a) Two independent WT cell lines and Lats1-CKO cell lines each were used to generate luminal-enriched and basal-like-enriched cultures, using FACS sorting with EpCAM and CD49f antibodies. The enriched cultures were subjected to RNA-seq analysis. Principal Component Analysis (PCA) of global gene expression of the indicated cultures is presented. (b) RNA from WT luminal-enriched and WT basal-like-enriched cultures were subjected to RT-qPCR analysis of conventional luminal and basal-like genes. Values were normalized to *Hprt*; *Krt8* and *Krt18* values in the luminal cultures and *Krt14* and *Krt5* values in the basal-like cultures, respectively, were set as 1.0. Mean  $\pm$  SD of 2 biological repeats. Source Data file is provided. (c) Integrative Genomics Viewer (IGV) snapshots depicting ATAC-seq signals in the vicinity of the indicated genes in the four different cell subpopulations (WT = wild type PyMT, L1 = Lats1-CKO). For each gene, the Y-axis scale is identical for the different subpopulations. The associated RefSeq gene structure is presented below the tracks. (d) WT and Lats1-CKO enriched luminal or basal-like cultures were subjected to immunofluorescent staining. Scale bar = 100 $\mu$ m. Representative images of 5 biological repeats. (e) Genes differentially expressed in WT luminal (WT lum) compared to WT basal-like (WT BL) cells (RNA-seq analysis using *DESeq2*, raw p-value < 0.05) were associated with ATAC-seq peaks present within 5kb of their TSS. Expression differences (log<sub>2</sub> fold change) are plotted against accessibility differences between WT luminal and WT basal-like cells (log<sub>2</sub> fold change), and peaks harboring an estrogen response element (ERE) are marked in red (HOMER<sup>1</sup> annotation). A total of 297 peaks are shown. (f) Genes contributing to the enrichment of the ER $\alpha$  activation signature in the GSEA analysis shown in figure 2e (left, 21 genes) were associated with ATAC peaks present within 5kb of their TSS (n= 40 peaks). For each peak, the mean read concentration (log<sub>2</sub>) in each condition was calculated. Boxplot shows median concentration of all peaks, lower and upper hinges correspond to the first and third quartiles and whiskers extend to the largest and smallest value. (g) Gene Set Enrichment Analysis (GSEA) of WT luminal vs Lats1-CKO luminal differential gene expression compared with Cicatiello et al “ER repressed” gene set<sup>2</sup>. (H) Cumulative ATAC-seq reads coverage of 72 enhancers of ER-repressed genes<sup>2</sup> in WT luminal, compared to Lats1-CKO luminal, cultures. Genes contributing to the leading edge of the GSEA in (g) were associated with enhancers using the ENC+EDP enhancer database<sup>3</sup>. Merged coverage from both replicates is shown. Lines depict average coverage, shaded areas represent SE. (i) WT and Lats1-CKO luminal-enriched and basal-like-enriched cultures were subjected to Western blot analysis with the indicated antibodies. GAPDH served as loading

control. Representative blot of 3 biological repeats. (j) Relative gene expression from RNA-seq in WT luminal vs Lats1-CKO luminal cultures was plotted according to magnitude of change ( $\log_2\text{FoldChange}$ , x-axis) and significance (*DESeq2*,  $-\log_{10}(\text{raw p-value})$ , y-axis). Dotted lines designate  $p\text{-value} < 0.05$  and  $\text{FC} > 1.5$ , respectively. Genes associated with significantly differential ATAC-seq peaks (WT luminal vs WT basal-like cells as shown in Fig 2b ( $\pm 5\text{kb}$  from TSS)) are colored according their increased accessibility in basal-like (BL) (red) or luminal (blue) cells.

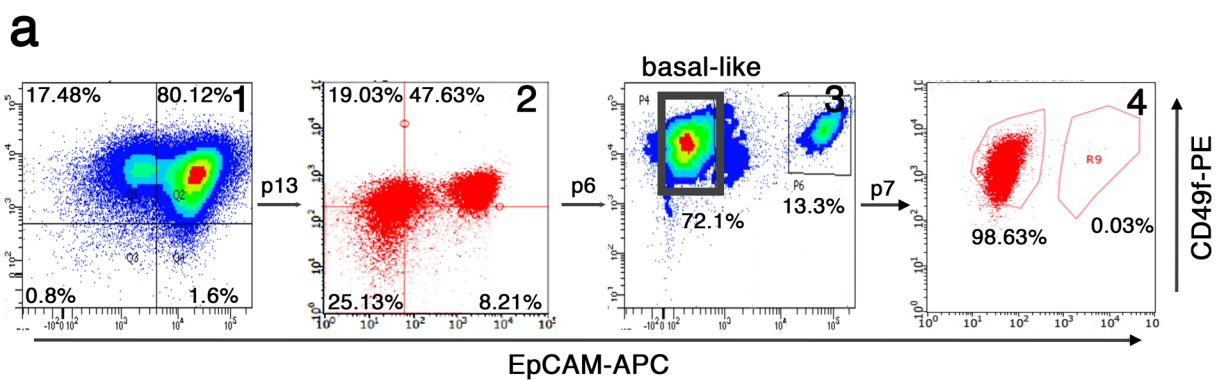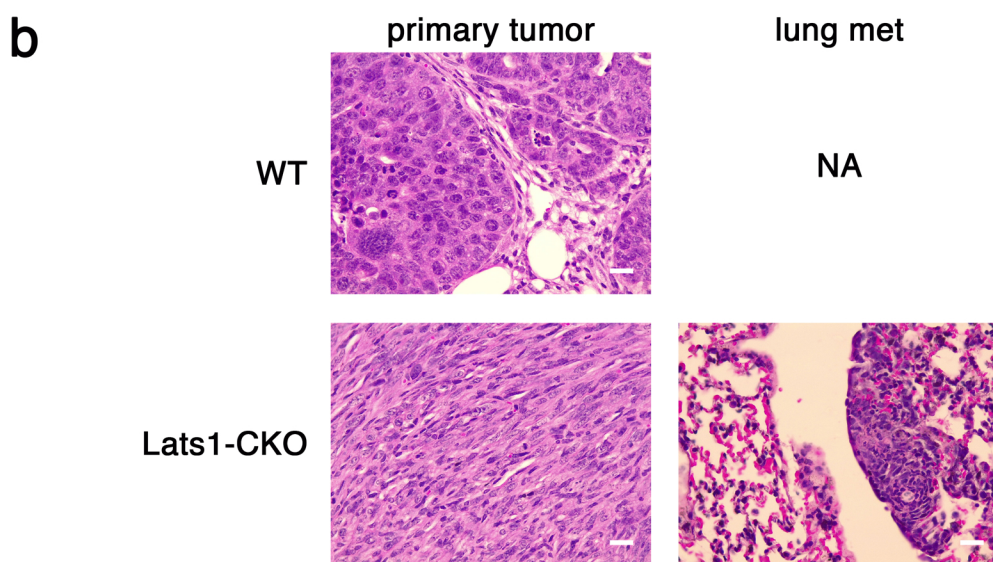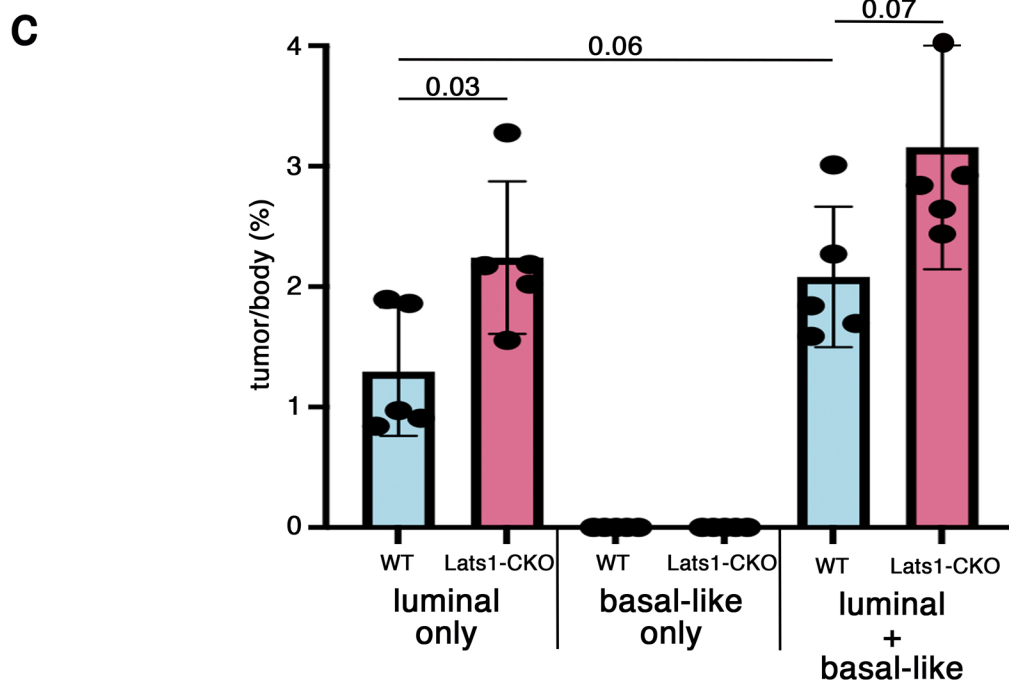

**Figure S3: Tumorigenic capacity of different types of PyMT tumor-derived cells.** (a) Dissociated cells from a freshly harvested Lats1-CKO PyMT tumor were profiled by FACS (top, panel 1), using antibodies for EpCAM and CD49f. Basal-like cells were defined as EpCAM<sup>low</sup>CD49f<sup>high</sup> (upper left quadrant). After a total of 19 passages in culture, the basal-like subpopulation was enriched by FACS sorting (panel 3), followed by 7 additional passages in culture and FACS analysis (panel 4). Bold black frame (“basal-like-sort”) depicts the gates used for FACS-enrichment of the basal-like cell population. (b) WT or Lats1-CKO PyMT tumor-derived cell lines were injected into mammary fat pads of 5 female FBV/N mice. After 4 weeks, tumors were excised and examined histologically. Representative H&E stained sections of primary tumors or lung metastases are presented. “NA” = Not Applicable. Scale bar = 25µm (c) Luminal only, basal-like only or an equal number of luminal and basal-like cells of the indicated genotypes were injected into the mammary fat pads of female FBV/N mice. Four weeks post-injection, tumors were excised and weighed. Values represent average ± SE of 5 mice from each group. Two-way ANOVA was used to compute significance. Source data are provided as a Source Data file.

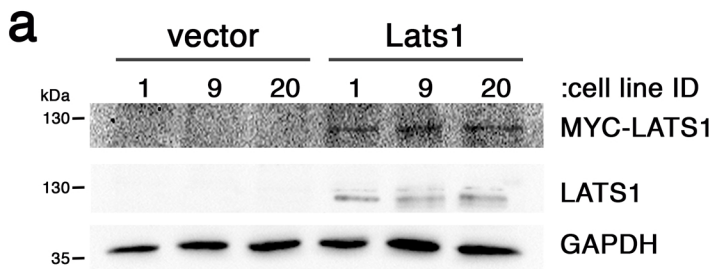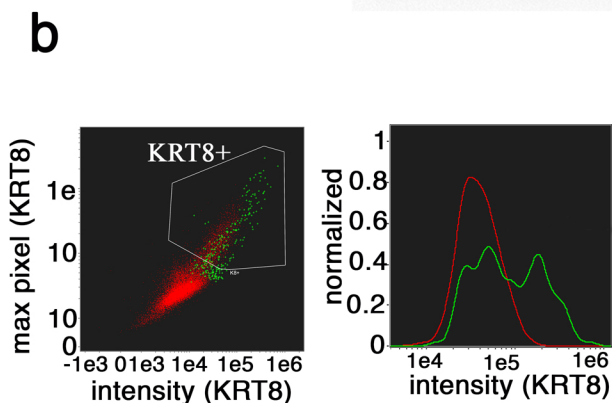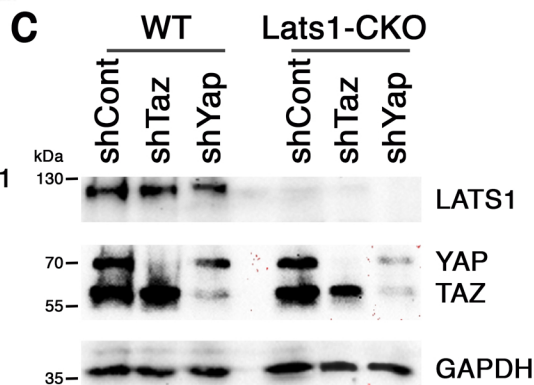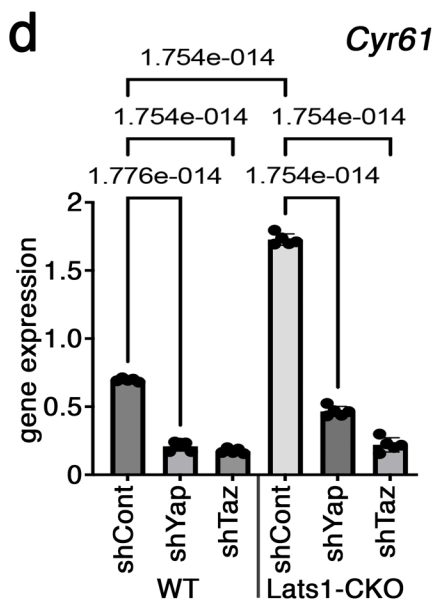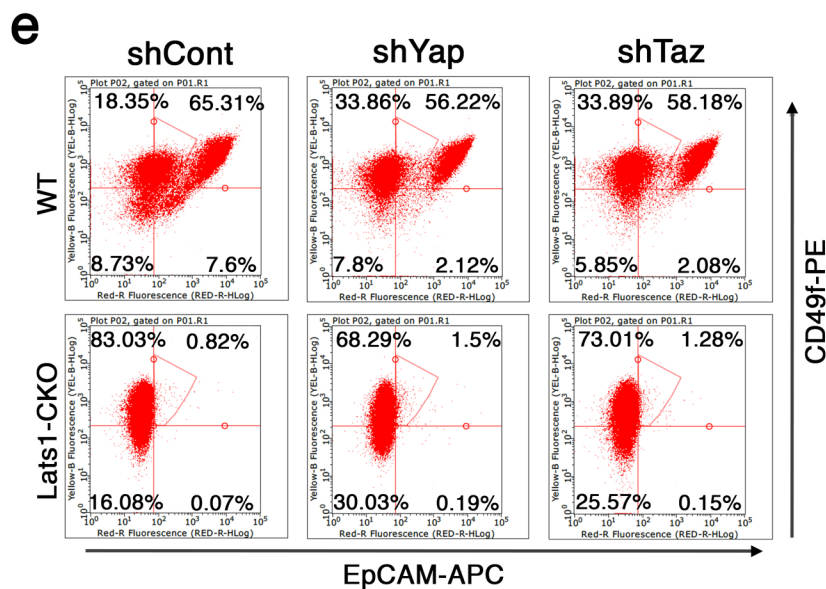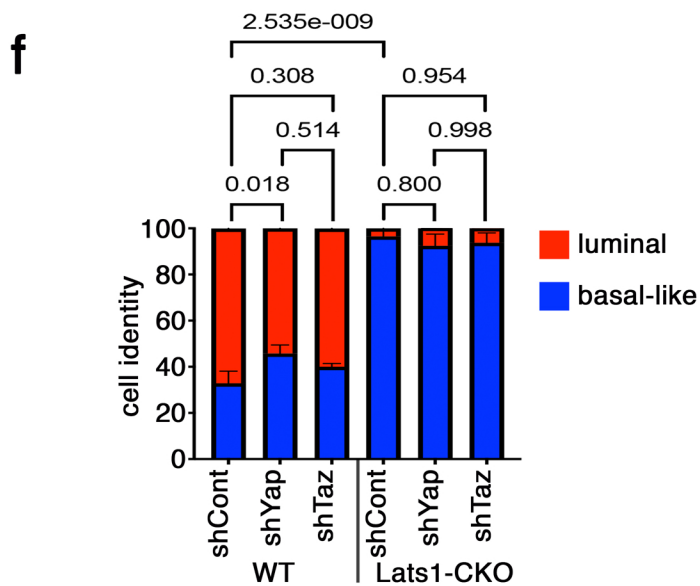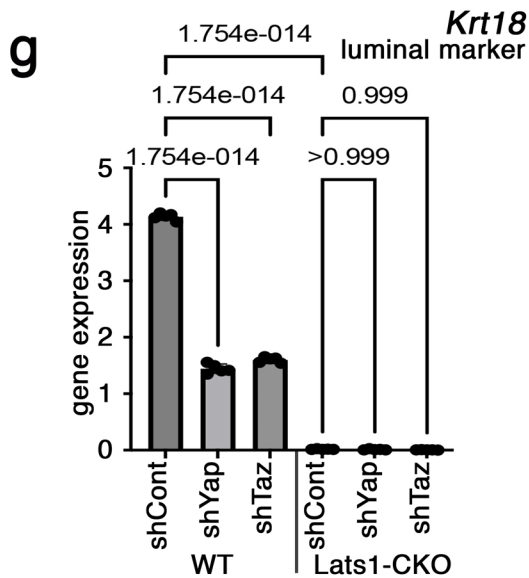



**Figure S4: LATS1 regulates phenotypic plasticity independently of YAP or TAZ.** (a) MYC-tagged mouse *Lats1*, or vector control, was introduced into three independent *Lats1*-CKO tumor-derived cell lines. Levels of LATS1 were assessed by Western blot analysis using antibodies against LATS1 or MYC-tag (9E10). GAPDH served as loading control. Numbers above each lane denote parental cell line number. Representative blot of 2 technical repeats. (b) *Lats1*-CKO (red) PyMT cells were transiently transfected with MYC-tagged LATS1 (OE-LATS1, green). After 48 hours, cells were fixed and stained with anti-MYC and anti-KRT8 antibodies and subjected to imaging flow cytometry (ImageStreamX). Only single, focused cells with intact nuclei were analyzed. KRT8 positive (KRT8+) and OE-LATS1 (MYC+) cells were defined compared to an unstained control or a vector only control, respectively. Distribution pattern of cells expressing KRT8 (left; shape encompasses cells stained positively for KRT8) and intensity of KRT8 (right) staining was measured for each cell population. (c) WT or *Lats1*-CKO basal-like-enriched cells harboring control shRNA (shCont) or stable knockdown of *Yap* (shYap) or *Taz* (shTaz) were subjected to Western blot analysis with an antibody reactive with both YAP and TAZ. GAPDH served as loading control. Representative blot of 3 biological repeats. (d) Cells as in (c) were subjected to RT-qPCR analysis of expression of the YAP/TAZ target *Cyr61*. Values were normalized to *Hprt*. Average  $\pm$  SE of 5 biological repeats. One-way ANOVA was used to calculate significance. Source data are provided as a Source Data file. (e) Cells as in (c) were analyzed by FACS, using EpCAM and CD49f antibodies. (f) Graphical representation of average relative numbers of luminal (upper right quadrant) or basal-like (upper left quadrant) cells, measured by FACS as in (e). Values represent average  $\pm$  SD of 3 biological repeats. One-way ANOVA was used to calculate significance. Source data are provided as a Source Data file. (g) Cells as in (c) were subjected to RT-qPCR analysis of expression of the luminal marker *Krt18*. Values were normalized to *Hprt*. Average  $\pm$  SE of 5 biological repeats. One-way ANOVA was used to calculate significance. Source data are provided as a Source Data file.

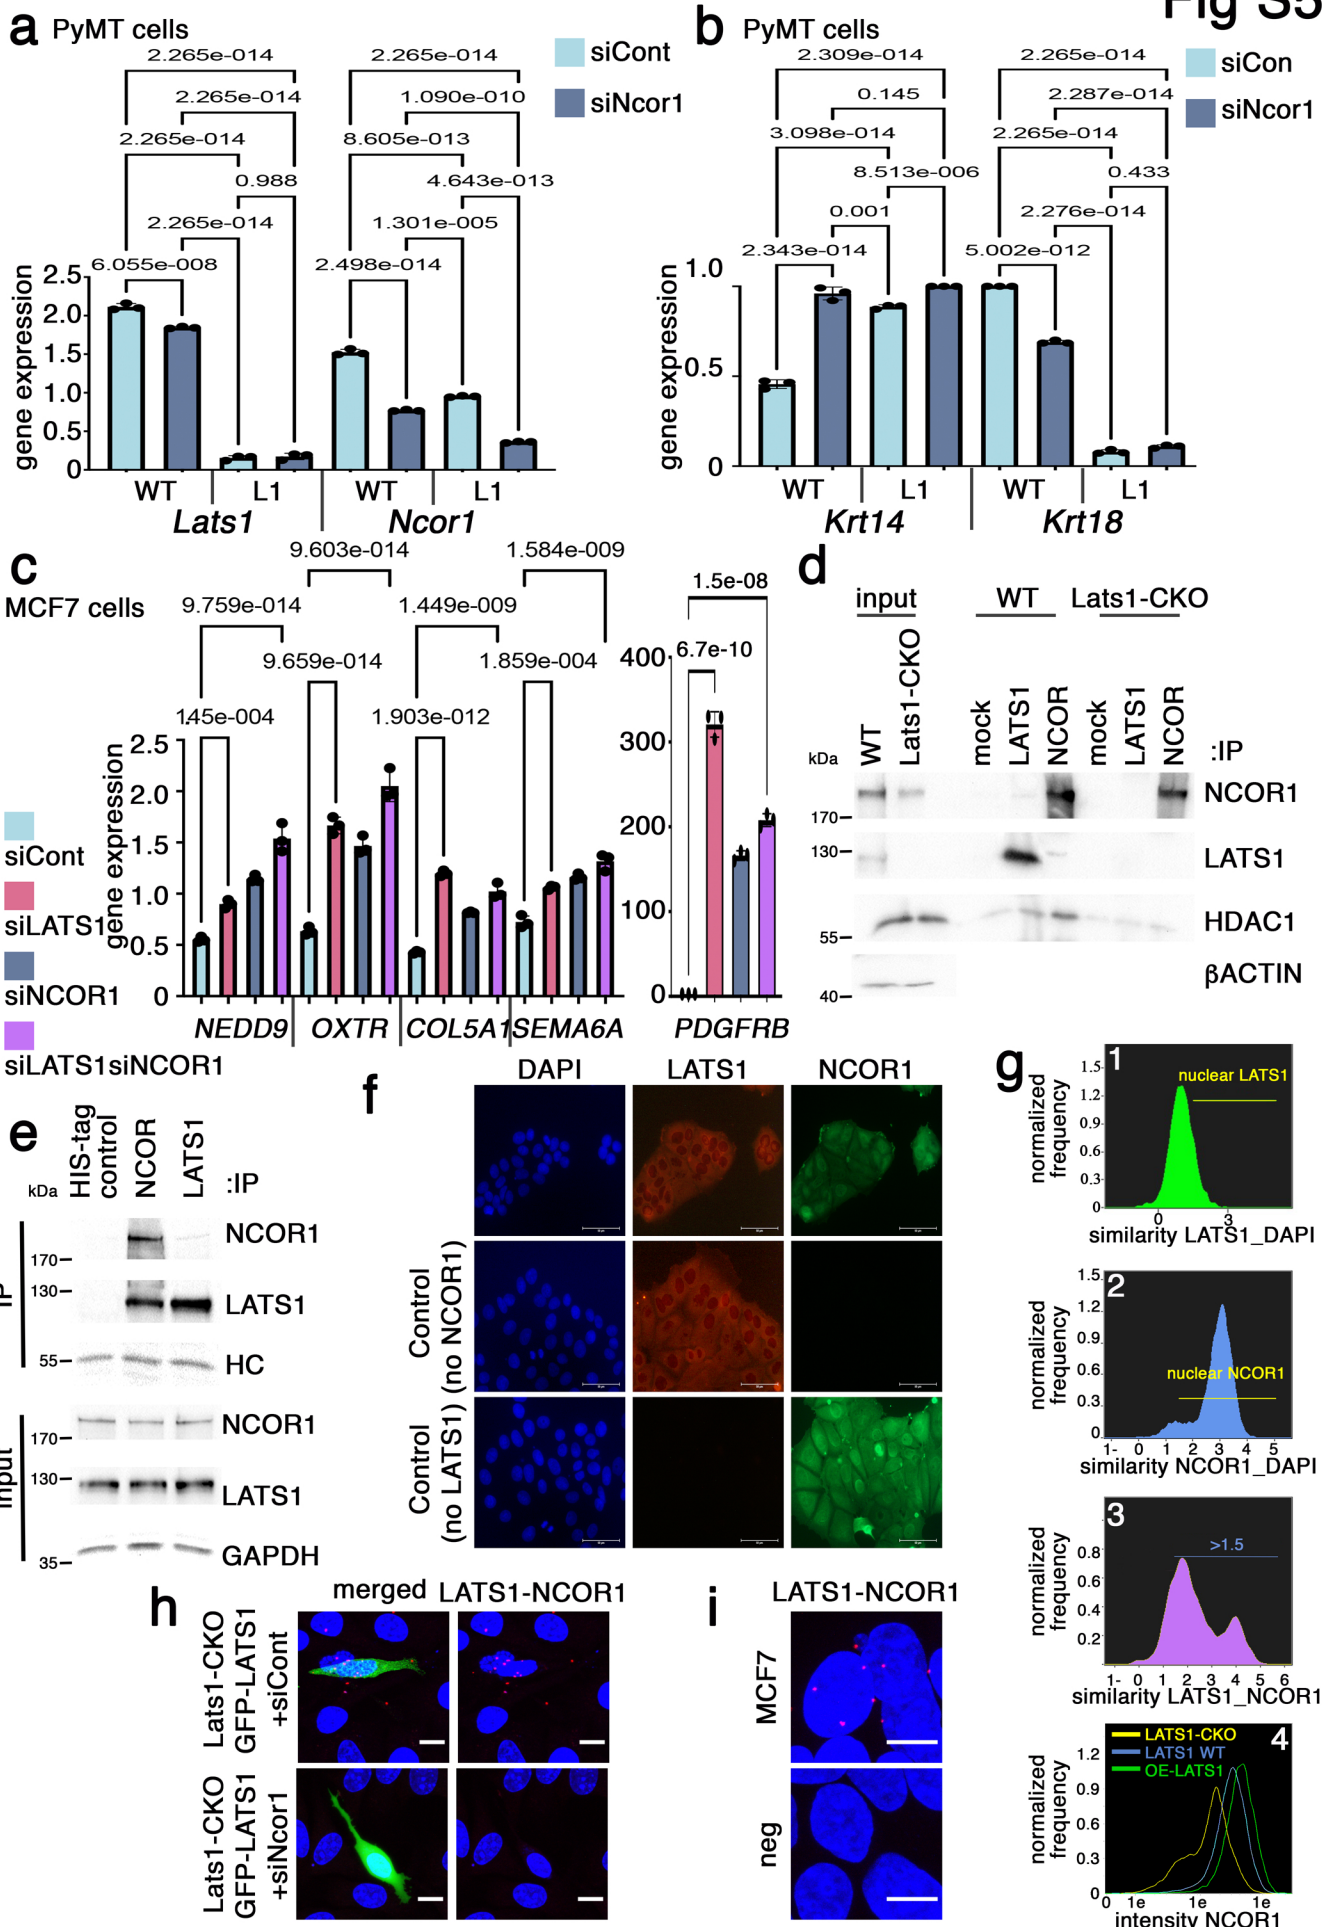

**Figure S5: Transcriptional effects of knockdown of *Lats1* and *Ncor1*.** (a) WT and *Lats1*-CKO PyMT cells were transfected with control siRNA (siCont) or siRNA against *Ncor1* (siNcor1). Three days later, an additional dose of siRNA was administered. Six days after the first transfection, cells were harvested for RT-qPCR analysis. Values were normalized to *Hprt*. WT siCont values were set as 1.0. Average  $\pm$  SE of 3 biological repeats. One-way ANOVA was used to calculate significance. Source data are provided. (b) RT-qPCR analysis in the same cells as in (a). Average  $\pm$  SE of 3 biological repeats. One-way ANOVA was used to calculate significance. Source data are provided. (c) MCF7 cells were transiently transfected with control siRNA (siCont) or siRNA against *LATS1*, *NCOR1* or both together. Two days later, cells were harvested for RT-qPCR analysis of *LATS1*-*NCOR1*-repressed genes. Values were normalized to *Hprt*. Average  $\pm$  SE of 3 biological repeats. One-way ANOVA was used to calculate significance. Source data are provided. (d) Endogenous proteins were immunoprecipitated (IP) from WT or *Lats1*-CKO PyMT cells, followed by Western blot analysis with the indicated antibodies. “mock” denotes beads only (no antibody) with lysate. 2.5% of each lysate was run as “input”.  $\beta$ -ACTIN served as loading control for input. Representative blot of 2 biological repeats. (e) Endogenous proteins were immunoprecipitated (IP) from MCF7 cells, followed by Western blot analysis with the indicated antibodies. A rabbit anti-HIS-tag antibody incubated with lysate served as a species-specific negative control. 2.5% of each lysate was run as “input”. GAPDH served as loading control for input, and antibody heavy chain (HC) as a loading control for IP. Representative blot of 5 biological repeats. (f) MCF7 cells were subjected to immunofluorescent staining with antibodies against endogenous *LATS1* (red) or endogenous *NCOR1* (green) (top panels). Reactions lacking primary antibodies against *NCOR1* (mid panels) or against *LATS1* (lower panels) served as cross-reactivity controls. Representative images of 3 biological repeats. (g) *Lats1*-CKO PyMT cells were transiently transfected with MYC-tagged *LATS1*, and 48 hours later were stained with anti-MYC and anti-*NCOR1* antibodies and subjected to imaging flow cytometry (ImageStreamX). Only single, focused cells with intact nuclei were analyzed. *NCOR1* positive and MYC-*LATS1* cells were defined compared to an unstained control or vector only controls, respectively. Similarity (correlation of staining pattern, see Materials and Methods) of *LATS1* and *NCOR1* with nuclear DAPI staining was used to assess cells with nuclear *LATS1* (panel 1) or nuclear *NCOR1* (panel 2). Similarity of staining patterns between *LATS1* and *NCOR1* was also measured (panel 3). The intensity of endogenous *NCOR1* staining was measured in *Lats1*-CKO cells (panel 4, yellow), WT-PyMT cells (panel 4, blue) and *Lats1*-CKO cells

overexpressing MYC-LATS1 (OE-LATS1)(panel 4, green). Similarity >1.5 was considered significant. (h) *Lats1*-CKO cells were transiently transfected with GFP-tagged mouse *Lats1* together with control siRNA (siCont) or *Ncor1* siRNA (siNcor1). Colocalization of endogenous NCOR1 and GFP-tagged LATS1 was evaluated by Proximity Ligation Assay (PLA), using antibodies against NCOR1 and GFP. Scale bar = 10 $\mu$ m. Representative images of 2 biological repeats. (i) Colocalization of endogenous NCOR1 and LATS1 in MCF7 cells was evaluated by PLA. Reactions lacking an antibody against NCOR1 served as a negative control. Scale bar = 10 $\mu$ m. Representative images of 2 biological repeats.

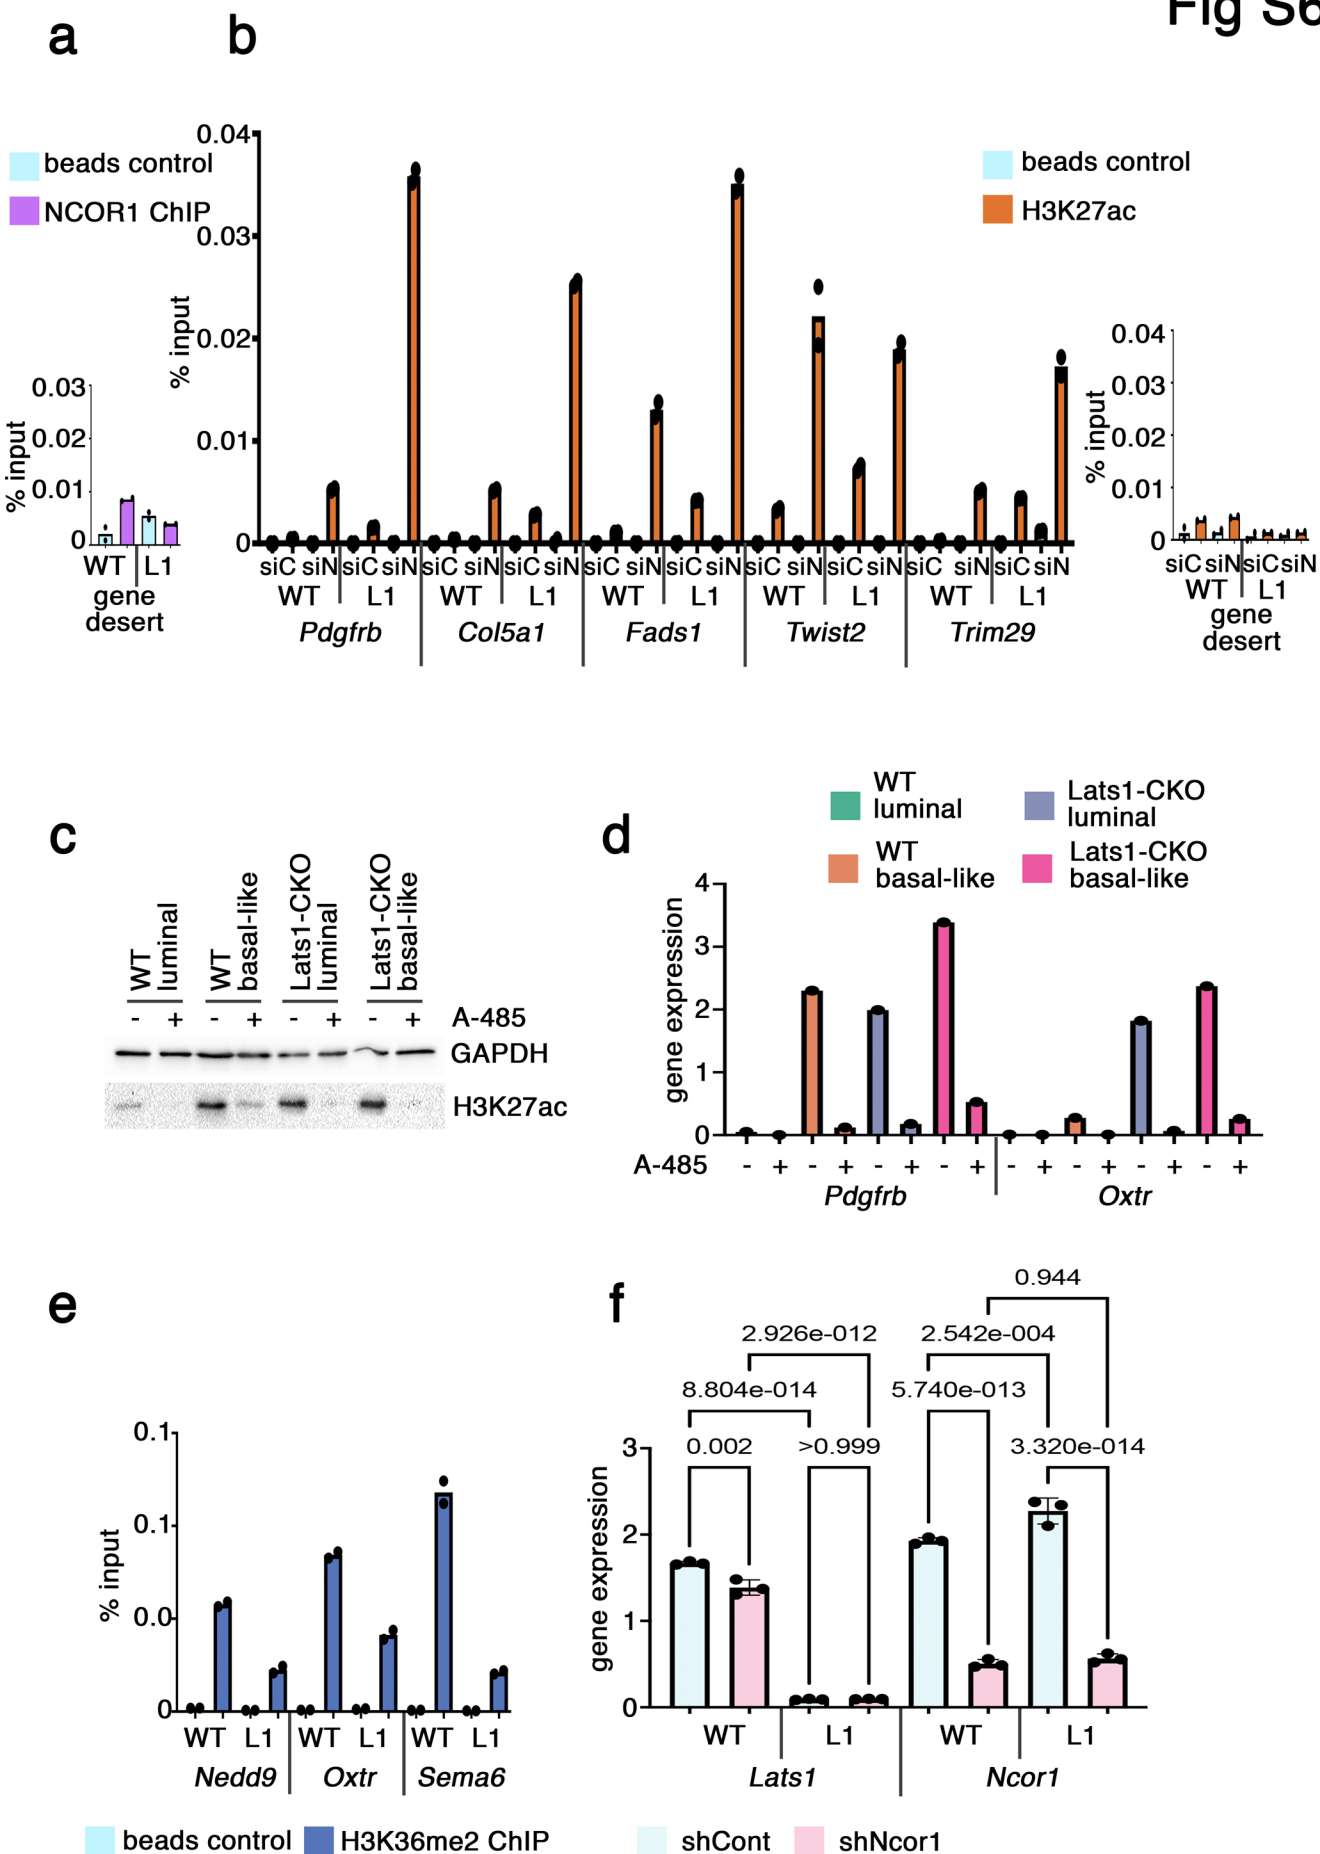

**Figure S6: ChIP and transcriptional analysis of ER-repressed genes.** (a) WT and Lats1-CKO (L1) cells were subjected to chromatin immunoprecipitation (ChIP) with antibodies against NCOR1. qPCR of a gene desert region on chromosome 12, as well as beads without antibody, incubated with chromatin (“beads control”), were used as background controls. Values were normalized to input, and represent averages of 2 biological repeats. Source data are provided as a Source Data file. (b) WT or Lats1-CKO cells were transfected with control siRNA (siC) or siRNA against *Ncor1* (siN) for 48 hours, followed by ChIP with antibodies against H3K27ac. qPCR of indicated regulatory regions of specific genes (left panel) and of a gene desert region on chromosome 12, as well as beads without antibody, incubated with chromatin (“beads control”), were used as background controls (right panel). Values represent averages of 2 biological repeats. Source data are provided as a Source Data file. (c) WT and Lats1-CKO luminal and basal-like enriched cultures were treated with 3 $\mu$ M of the p300 inhibitor A-485. Cells were harvested after 24 hours and analyzed by Western blot for H3K27ac. GAPDH served as a loading control. Representative blot of 2 technical repeats. (d) The relative expression of LATS1-NCOR1-repressed genes was examined by RT-qPCR. *Gapdh* was used for normalization. Source data are provided as a Source Data file. (e) WT or Lats1-CKO cells were transfected as in (b) followed by ChIP with antibodies against H3K36me2. Controls and data analysis were as in (b). Values represent averages of 2 biological repeats. Source data are provided as a Source Data file. (f) WT and Lats1-CKO cells were infected with recombinant lentiviruses expressing control shRNA (shCont) or shRNA against *Ncor1* (shNcor1) and maintained under drug selection for at least 2 weeks, followed by RT-qPCR analysis of *Lats1* (left) and *Ncor1* (right) mRNA. Values were normalized to *Hprt* and represent the mean  $\pm$  SE of 3 biological replicates. One-way ANOVA was used to calculate significance. Source data are provided as a Source Data file.

a

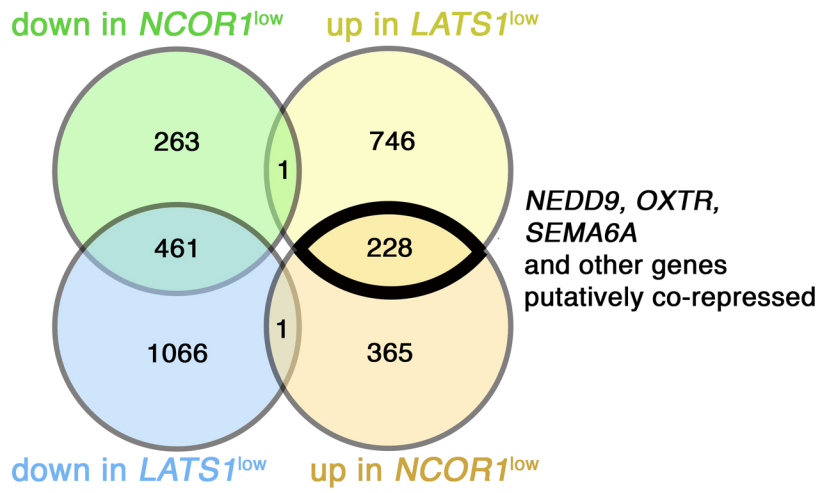

b

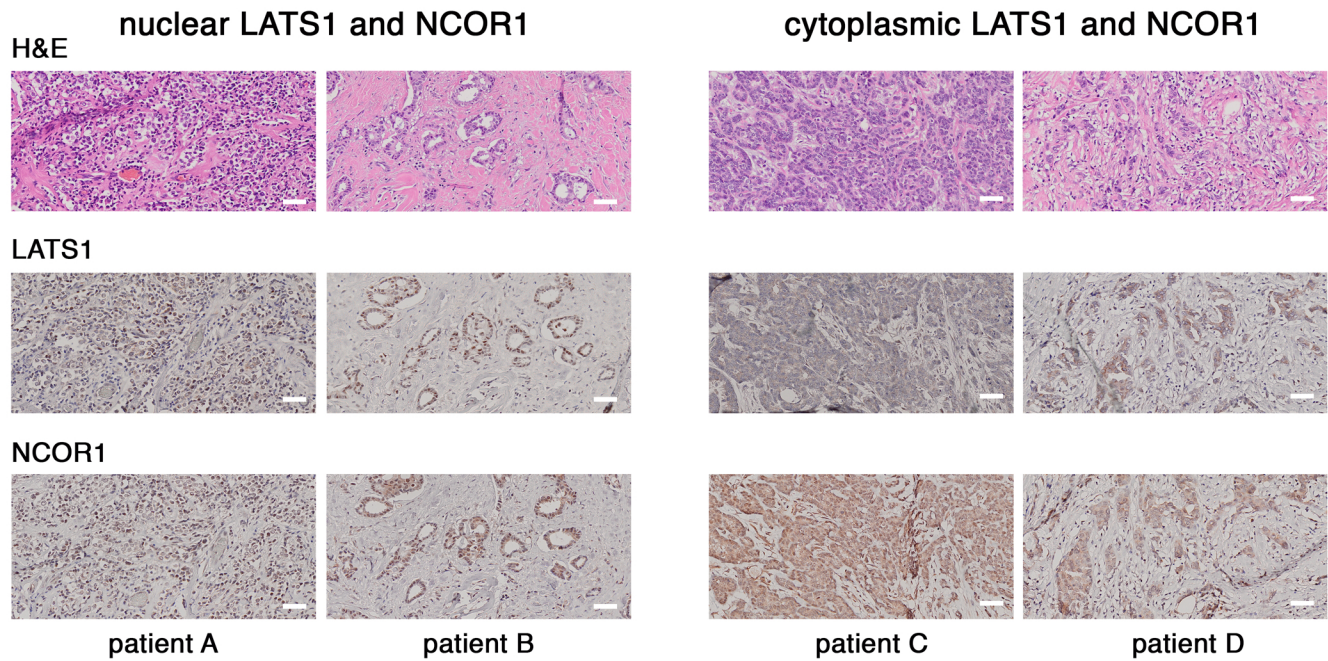

**Figure S7: LATS1 and NCOR1 have similar effects on the expression of ER-repressed genes in human luminal breast cancer.** (a) Comparison of gene expression in human luminal B tumors (BRCA-TCGA database) with low levels of *LATS1* ( $LATS1^{low}$ ) or low levels of *NCOR1* ( $NCOR1^{low}$ ). The Venn diagram depicts genes differentially expressed ( $FC > 1.5$ ,  $p\text{-value} < 0.05$ ). Top vs bottom quartiles of *NCOR1* or *LATS1* expression were used to define tumors with high or low *NCOR1* or *LATS1*, respectively. Numbers within regions represent number of genes. Bold black outline indicates the group of genes putatively co-repressed by LATS1 and NCOR1. (b) Immunohistochemistry (IHC) analysis of LATS1 and NCOR1 in human luminal breast tumors. Two representative tumor sections with nuclear LATS1 and NCOR1 (samples A and B) and two representative tumor sections with cytoplasmic LATS1 and NCOR1 (samples C and D) are presented (scale bar = 50 $\mu$ m).



## References:

- 1 Heinz, S. *et al.* Simple combinations of lineage-determining transcription factors prime cis-regulatory elements required for macrophage and B cell identities. *Mol Cell* **38**, 576-589, doi:10.1016/j.molcel.2010.05.004 (2010).
- 2 Cicatiello, L. *et al.* Estrogen receptor alpha controls a gene network in luminal-like breast cancer cells comprising multiple transcription factors and microRNAs. *Am J Pathol* **176**, 2113-2130, doi:10.2353/ajpath.2010.090837 (2010).
- 3 Gorkin, D. U. *et al.* An atlas of dynamic chromatin landscapes in mouse fetal development. *Nature* **583**, 744-751, doi:10.1038/s41586-020-2093-3 (2020).

**Table S1:** Table of reagents used in study

**Table S2:** Number of reads and peaks, ATAC-seq

**Table S3:** ATAC-seq motif enrichment

**Table S4:** ATAC-seq ERE motif enrichments

Supplementary Table 1

| <b>EpiTOF antibodies</b> |                                                                               |                    |              |        |
|--------------------------|-------------------------------------------------------------------------------|--------------------|--------------|--------|
| protein name             | Name                                                                          | Product            | Provider     | Metal  |
| EpCAM                    | Anti- Mouse CD326 [EpCAM] (G8.8)-166Er                                        | 3166014            | FLUIDIGM     | 166Er  |
| CD49f                    | Anti-Human/Mouse CD49F (GoH3)-164Dy—100 Tests                                 | 3164006B           | FLUIDIGM     | 164Dy  |
| CD45                     | Anti-Mouse CD45 (30-F11)-89Y—100 Tests                                        | 3089005B           | FLUIDIGM     | 89Y    |
| CD24                     | Anti-Mouse CD24 150Nd (cancer stem cell marker)                               | 3150009B           | FLUIDIGM     | 150Nd  |
| CD44                     | Anti-Human/ Mouse CD44 171Yb (cancer stem cell marker)                        | 3171003            | FLUIDIGM     | 171Yb  |
| a-SMA                    | alpha SMA (Smooth muscle actin) (fibroblast marker)                           | ab5694             | Abcam        | 173Yb  |
| GATA3                    | Anti-Human/ Mouse GATA3 167Er                                                 | 3167007A           | FLUIDIGM     | 167Er  |
| ERa                      | Anti-Estrogen Receptor alpha antibody [E115] - Low endotoxin, Azide free      | ab167611           | Abcam        | 146 Nd |
| beta-Catenin             | Anti-Human/ Mouse/ Rat beta-Catenin 147Sm                                     | 3147005            | FLUIDIGM     | 147Sm  |
| CyclinB                  | Anti-Human/ Mouse CyclinB1                                                    | 3153009A           | FLUIDIGM     | 153eu  |
| Ki-67                    | Anti- Human Ki-67 (B56) 162Dy                                                 | 3162012            | FLUIDIGM     | 162Dy  |
| p53                      | Anti-Human p53                                                                | 3143018            | FLUIDIGM     | 143Nd  |
| OCT3/4                   | Anti-Human/Mouse Oct3/4 (40/Oct-3)-165Ho 50 Tests                             | 3165023A           | FLUIDIGM     | 165Ho  |
| AREG                     | Anti-Human/ Mouse AREG                                                        | LS-C341363         | LSBio        | 159Tb  |
| p21                      | Anti-p21 antibody [EPR18021] - BSA and Azide free                             | ab232512           | Abcam        | 174 Yb |
| ZEB1                     | EMT azide and BSA free                                                        | NBP2-81015         | Novus        | 158 Gd |
| YAP                      | D8H1X                                                                         | CST-14074-BF       | CST          | 161 Dy |
| EZH2                     | D2C9                                                                          | CST-5246-BF        | CST          | 144 Nd |
| LATS1                    | (C66B5)                                                                       | CST-3477-BF        | CST          | 169 Tm |
| pYAP (S127)              | D9W2I                                                                         | CST-13008          | CST          | 151 Eu |
| H3                       | Anti-Histone 3 (D1H2)-176Yb 50 Tests                                          | 3176016A           | FLUIDIGM     | 176Yb  |
| pH3                      | Anti-Human/ Mouse/ Rat pHistone H3 [Ser28]                                    | 3175012A           | FLUIDIGM     | 175Lu  |
| cleaved H3               | Rabbit monoclonal anti-cleaved-Histone H3 (Thr22) (clone D7J2K)               | CST-12576 (custom) | CST          | 163Dy  |
| H3K27ac                  | Acetyl-Histone H3 (Lys27) (D5E4) XP® Rabbit mAb #8173                         | CST-8173P          | CST          | 160Gd  |
| H3K36me3                 | Tri-Methyl-Histone H3 (Lys36) (D5A7) XP® Rabbit mAb #4909                     | CST-4909           | CST          | 141Pr  |
| H3.3                     | Rabbit monoclonal anti-Histone H3.3 (clone EPR17899)                          | ab176840           | Abcam        | 155Gd  |
| H3K4me3                  | Tri-Methyl-Histone H3 (Lys4) (C42D8) Rabbit mAb #9751                         | CST-9751           | CST          | 145Nd  |
| H3K27me3                 | Mouse monoclonal anti-trimethyl-Histone H3 (Lys27) (clone MABI 0323)          | Active Motif-61017 | Active Motif | 168Er  |
| H3K4me1                  | Mono-Methyl-Histone H3 (K4) (D1A9) XP(R) Rabbit mAb, 100 ul                   | CST-5326S          | CST          | 154Sm  |
| H3K9me3                  | Tri-Methyl-Histone H3 (Lys9) (D4W1U) Rabbit mAb #13969                        | CST-13969S         | CST          | 170Er  |
| H2B                      | Recombinant Anti-Histone H2B antibody [EP957Y] - BSA and Azide free           | ab239842           | Abcam        | 142Nd  |
| H4K16Ac                  | Acetyl-Histone H4 (Lys16) (E2B8W) Rabbit mAb                                  | CST-13534          | CST          | 152Sm  |
| H3K36me2                 | Di-Methyl-Histone H3 (Lys36) (C75H12) Rabbit mAb #2901                        | CST-2901           | CST          | 149Sm  |
| H3K64ac                  | Anti-Histone H3 (acetyl K64) antibody [EPR20713] - BSA and Azide free, 100 ug | ab251549           | Abcam        | 156Gd  |

**other antibodies**

|           |                                                                                 |             |            |
|-----------|---------------------------------------------------------------------------------|-------------|------------|
| LATS1     | (C66B5) Rabbit mAb                                                              | CST-3477    | CST        |
| LATS1     | LATS1 antibody                                                                  | HPA031804   | Sigma      |
| GAPDH     | (14C10) Rabbit mAb                                                              | CST-2118    | CST        |
| MYC-tag   | 9E10                                                                            | ab32        | Abcam      |
| H3        | Anti-Histone H3 antibody - Nuclear Marker and ChIP Grade (ab1791)               | ab1791      | Abcam      |
| H3K27ac   | Acetyl-Histone H3 (Lys27) (D5E4) XP® Rabbit mAb                                 | CST-8173P   | CST        |
| H3K36me2  | Di-Methyl-Histone H3 (Lys36) (C75H12) Rabbit mAb (Alexa Fluor® 647 Conjugate)   | CST-15090   | CST        |
| ERa       | Recombinant Anti-Estrogen Receptor alpha antibody [E115] - ChIP Grade (ab32063) | ab32063     | Abcam      |
| EpCAM-APC | CD326 (EpCAM), mouse                                                            | 130-102-234 | Miltenyl   |
| EpCAM-APC | anti human CD326 (Ep-CAM) 9C4                                                   | 324208      | Biologend  |
| CD49f-PE  | human & mouse                                                                   | 130-119-767 | Miltenyl   |
| YAP/TAZ   | YAP/TAZ (D24E4) Rabbit mAb                                                      | CST-8418    | CST        |
| GFP       | Anti-GFP from mouse [9F9.F9]                                                    | ab1218      | Abcam      |
| NCOR1     | NCoR1 Antibody                                                                  | CST-5948    | CST        |
| NCOR1     | NCoR1 Antibody                                                                  | ab3482      | Abcam      |
| NCOR1     | NCoR1 Antibody (F-1)                                                            | sc-515934   | Santa Cruz |
| HDAC1     | HDAC1 (D5C6U) XP® Rabbit mAb                                                    | CST-34589   | CST        |
| KRT8      | Anti-Cytokeratin 8 Antibody, clone TROMA-1                                      | MABT329     | Sigma      |
| KRT14     | Anti-Cytokeratin 14 Antibody (LL001)                                            | sc-53253    | Santa Cruz |
| b-ACTIN   | beta Actin Antibody monoclonal mouse nonconjugated                              | A00702      | GenScript  |

**qPCR primers**

|       |                               |                   |
|-------|-------------------------------|-------------------|
| Cyr61 | F-5' CGGAGGTGGAGTTAACGAGAAA   | mouse, expression |
|       | R-5' AAGACAGGAAGCCTCTTCAGTGAG |                   |
| Krt14 | F-5' AGCGGCAAGAGTGAGATTCT     | mouse, expression |
|       | R-5' CCTCCAGGTTATTCTCCAGGG    |                   |
| Krt18 | F-5' CAGCCAGCGTCTATGCAGG      | mouse, expression |
|       | R-5' CCTTCTCGGTCTGGATTCCAC    |                   |
| Krt8  | F-5' TCCATCAGGGTGACTCAGAAA    | mouse, expression |
|       | R-5' CCAGCTTCAAGGGGCTCAA      |                   |
| Krt5  | F-5' TCTGCCATCACCCCATCTGT     | mouse, expression |
|       | R-5' CCTCCGCCAGAACTGTAGGA     |                   |

|             |                                                              |                   |
|-------------|--------------------------------------------------------------|-------------------|
| Lats1       | F-5' AGCAGCACGTAGAGAACGTCC<br>R-5' AATCCAACCCGCATCATTTC      | mouse, expression |
| Ncor1       | F-5' CTGCTCCGCATCAAGTGATAA<br>R-5' CCAGGAGTCCCTGTGAGATA      | mouse, expression |
| Cna2        | F-5' AAGAGAATGTCAACCCCGAAAAA<br>R-5' ACCCGTCGAGTCTTGAGCTT    | mouse, expression |
| Oxtr        | F-5' GGCCGTGTTCCAGGTTCTC<br>R-5' TGCAAGTATTTGACCAGACGAC      | mouse, expression |
| Sema6       | F-5' ACAGCCTGCCCCCTAAAGT<br>R-5' AGCTCCTCTTATATTCGAGCCC      | mouse, expression |
| Pdgfrb      | F-5' AGGAGTGATACCAGCTTTAGTCC<br>R-5' CCGAGCAGGTCAGAACAAAGG   | mouse, expression |
| Cna2        | F-5' AAGAGAATGTCAACCCCGAAAAA<br>R-5' ACCCGTCGAGTCTTGAGCTT    | mouse, expression |
| Fads1       | F-5' AGCACATGCCATACAACCATC<br>R-5' TTTCCGCTGAACCACAAAATAGA   | mouse, expression |
| Twist2      | F-5' CGCTACAGCAAGAAATCGAGC<br>R-5' GCTGAGCTTGTCAGAGGGG       | mouse, expression |
| Col5a1      | F-5' CTTGCGCCTACTCTGTTC<br>R-5' CCCTGAGGGCAAATTGTGAAAA       | mouse, expression |
| Nedd9       | F-5' ATGTGGGCGAGGAATCTTATGG<br>R-5' TTCCTGGGACAATGCCTTG      | mouse, expression |
| NEDD9       | F-5' ATGGCAAGGGCCTTATATGACA<br>R-5' TTCTGCTCTATGACGGTCAGG    | human, expression |
| OXTR        | F-5' CTGCTACGGCCTTATCAGCTT<br>R-5' CGCTCCACATCTGCACGAA       | human, expression |
| SEMA6A      | F-5' AATCAGTATTTTCGCATGGCAACT<br>R-5' GCAATGTAGAGGGTTCCGTTCA | human, expression |
| COL5A1      | F-5' GCCCGGATGTCGCTTACAG<br>R-5' AAATGCAGACGCAGGGTACAG       | human, expression |
| PDGFRB      | F-5' AGCACCTTCGTTCTGACCTG<br>R-5' TATTCTCCCGTGTCTAGCCCA      | human, expression |
| Chr12 ChIP  | F-5' CCATTGTTGGTGGGATTGC<br>R-5' TGAGGAACCGCCAGACTGAT        | gene desert       |
| Kisser ChIP | F-5' TCCCTCTCCGTAGACATGGG<br>R-5' AAGGAGCCTTTCGCATCTCC       | TSS               |
| Klh19 ChIP  | F-5' TCCTTCCTTCTTCCCGGT<br>R-5' AACGACGACCACAGGTTGTT         | enhancer          |
| Oxtr ChIP   | F-5' TGCTATGCCAAAGACCCAG<br>R-5' AGTGACAGCTTGGACGAAGG        | promoter          |
| Sema6a ChIP | F-5' TACCAAAAAGGAACCCGGCA<br>R-5' TGTAAGTCCAAGCAGCGGAG       | enhancer          |
| Nedd9 ChIP  | F-5' CCCTACTGTCCCACTGCTA<br>R-5' GGAAACTCCACGTCACACCT        | enhancer          |
| Pdgfrb-TSS  | F-5' TGGGGCAGGCCACTCTAATA<br>R-5' GGACGCGTGTGTCTGTTTT        | TSS               |
| Col5a1-ChIP | F-5' AGCCAGAGCTGTTTCAGATGTT<br>R-5' GAGCCTTCTGGAGCTCTCTTG    | enhancer          |
| Twist2-ChIP | F-5' AGACAAAAGTGAAGTGCCGC<br>R-5' CCAGGGGCAGGACAAATCT        | TSS               |
| Trim29-ChIP | F-5' CAGTCTAGGCTGAAGCACCC<br>R-5' CCCAGGCCTGTCCCTAAATG       | intron            |
| Fads1-ChIP  | F-5' TCATGGCAAGGACAGCGATT<br>R-5' CGCTGGGGAACCTTTCACAT       | TSS               |

#### plasmids

|                                                     |
|-----------------------------------------------------|
| pCMV-6myc-mouse LATS1 expression vector             |
| pEGFP3C-full length MmLats1-WT                      |
| pcDNA III                                           |
| pEGFP3C vector                                      |
| pCDNA4TO-6xMyc-hsLATS1                              |
| pCDNA4/TO-Flag                                      |
| pcDNA6/TR                                           |
| pLP1 (packaging vector for lentivirus)              |
| pLP2 (packaging vector for lentivirus)              |
| pVSVG (packaging vector for lentivirus)             |
| smart vector inducible non-targeting hEF1a turboRFP |
| Smart vector inducible shYAP                        |
| Smart vector inducible shTAZ (WWTR1)                |
| PLKO1 shNCOR1 (mouse)                               |

#### knockdown sequences

|                                     |                                                                   |
|-------------------------------------|-------------------------------------------------------------------|
| shYAP (seq GCATGAGACAGCTTCCATA)     |                                                                   |
| shNCOR1 (seq CGGCATAATCTTGACAACCTT) |                                                                   |
| pLKO.1 eGFP shRNA control           |                                                                   |
| siCont                              | siRNA SMARTpool (Dharmacon)                                       |
| siNcor1                             | siRNA SMARTpool siGENOME Mouse Ncor1 M-058556-01-0005 (Dharmacon) |

Supplementary Table S2

| Sample    | Replicate | No. of reads (total) | Number of nucleosome-free reads (uniquely and properly paired) | No. of Peaks |
|-----------|-----------|----------------------|----------------------------------------------------------------|--------------|
| WT-lum    | 1         | 125,474,813          | 10,764,697                                                     | 72,685       |
| WT-lum    | 2         | 101,645,671          | 7,514,288                                                      | 58,783       |
| WT-Bas    | 1         | 125,581,278          | 16,786,894                                                     | 70,446       |
| WT-Bas    | 2         | 124,679,765          | 6,606,816                                                      | 51,497       |
| L1-KO-lum | 1         | 111,389,522          | 2,159,884                                                      | 14,753       |
| L1-KO-lum | 2         | 157,106,727          | 8,967,914                                                      | 93,467       |
| L1-KO-Bas | 1         | 126,393,577          | 10,823,469                                                     | 86,279       |
| L1-KO-Bas | 2         | 125,802,680          | 6,137,454                                                      | 99,022       |

\* sample was excluded from further analysis

Supplementary Table 3  
 Motif enrichments Genomatix TF families  
 Z-Score >2 cutoff

| upLuminal | Z-Score (genome) | upBasal-like | Z-Score (genome) |
|-----------|------------------|--------------|------------------|
| ZF5F      | 20.75            | AP1F         | 16.49            |
| SP1F      | 19.65            | NF1F         | 11.32            |
| AP2F      | 19.09            | ZF02         | 10.92            |
| AP1F      | 18.08            | HAML         | 10.7             |
| NRF1      | 17.45            | AP2F         | 10.64            |
| ZF15      | 15.87            | NOLF         | 10.22            |
| AP1R      | 14.08            | AP1R         | 10.01            |
| BEDF      | 13.69            | SP1F         | 9.99             |
| EBOX      | 13.12            | ZF11         | 9.41             |
| ZF02      | 12.96            | MYOD         | 9.19             |
| EGRF      | 12.66            | ZTRE         | 8.28             |
| SNAI      | 12.58            | CTCF         | 8.28             |
| E2FF      | 12.4             | KLFS         | 7.95             |
| KLFS      | 12.34            | EGRF         | 7.72             |
| NF1F      | 12.12            | ZF36         | 7.62             |
| CTCF      | 10.85            | AP4R         | 7.5              |
| ZTRE      | 10.8             | BEDF         | 7.48             |
| XCPE      | 10.7             | ZF29         | 7.4              |
| ZICF      | 10.62            | ZFXY         | 7.28             |
| GLIF      | 10.52            | HESF         | 6.88             |
| ZFHX      | 9.92             | ZF32         | 6.48             |
| MAZF      | 9.7              | MAZF         | 5.88             |
| MYOD      | 9.7              | NDPK         | 5.59             |
| TF2B      | 9.65             | ZF5F         | 5.5              |
| MTEN      | 8.59             | GLIF         | 5.36             |
| NOLF      | 8.3              | NFKB         | 5.36             |
| BRAC      | 8.26             | ZF64         | 5.27             |
| GCF2      | 8.2              | RBPF         | 5.23             |
| XBBF      | 7.73             | ZF07         | 5.18             |
| HAND      | 7.55             | GCF2         | 5.16             |
| HESF      | 7.54             | NEUR         | 5                |
| HIFF      | 7.52             | HAND         | 4.92             |
| AHRR      | 7.38             | SMAD         | 4.92             |
| HDBP      | 7.2              | P53F         | 4.85             |
| ZF22      | 7.15             | STAF         | 4.84             |
| RXRF      | 7.03             | MTEN         | 4.82             |
| NDPK      | 7.01             | ZF22         | 4.81             |
| WHNF      | 6.93             | EBOX         | 4.8              |
| CDEF      | 6.82             | MIZ1         | 4.78             |
| NFKB      | 6.63             | SREB         | 4.77             |
| HASF      | 6.56             | YBXF         | 4.56             |
| ZF07      | 6.48             | INSM         | 4.47             |
| ZF43      | 6.42             | PAX5         | 4.42             |

|      |      |      |      |
|------|------|------|------|
| PAX9 | 6.39 | ZICF | 4.35 |
| CALM | 6.37 | IKRS | 4.31 |
| SMAD | 6.36 | RP58 | 4.26 |
| ZF29 | 6.17 | CP2F | 4.23 |
| ZF36 | 6.01 | NGRE | 4.17 |
| OAZF | 6    | ZF43 | 3.99 |
| CHRE | 5.85 | HIFF | 3.82 |
| INSM | 5.8  | XCPE | 3.6  |
| E4FF | 5.77 | HICF | 3.55 |
| DEAF | 5.7  | E2FF | 3.51 |
| TALE | 5.61 | ZF19 | 3.48 |
| AP4R | 5.53 | NACA | 3.44 |
| ZF64 | 5.52 | KOX8 | 3.36 |
| CP2F | 5.47 | ETSF | 3.36 |
| MIZ1 | 5.29 | AHRR | 3.28 |
| MYRF | 5.04 | OAZF | 3.26 |
| VEZF | 5.03 | ZF42 | 3.24 |
| FXRE | 5.01 | MZF1 | 3.14 |
| SREB | 4.97 | FXRE | 3.11 |
| ZF11 | 4.96 | SAL2 | 2.97 |
| CREB | 4.84 | RXRF | 2.97 |
| NGRE | 4.79 | NRF1 | 2.94 |
| PTF1 | 4.76 | WHNF | 2.89 |
| ZF57 | 4.75 | PAX9 | 2.85 |
| RBP2 | 4.71 | RBP2 | 2.77 |
| ZFXY | 4.61 | PBXC | 2.77 |
| ZF32 | 4.35 | MYRF | 2.67 |
| PEG3 | 4.33 | TF3C | 2.64 |
| MEF3 | 4.29 | ZF04 | 2.63 |
| NEUR | 4.01 | NRSF | 2.52 |
| ZF37 | 3.97 | ZF21 | 2.35 |
| EREF | 3.92 | VEZF | 2.28 |
| ZF33 | 3.72 | ZF08 | 2.18 |
| BTBF | 3.64 | OSRF | 2.16 |
| ZBED | 3.61 | ZF20 | 2.07 |
| HICF | 3.5  | NKRF | 2.07 |
| PAX5 | 3.46 | TELO | 2.06 |
| MIRF | 3.34 | HUB1 | 2.01 |
| CARE | 3.24 | MOKF | 2    |
| ESRR | 3.2  | PEG3 | 2    |
| SAL2 | 3.09 | PTF1 | 2    |
| SF1F | 2.97 |      |      |
| NACA | 2.94 |      |      |
| ZF42 | 2.94 |      |      |
| PURA | 2.92 |      |      |
| DICE | 2.82 |      |      |
| TZAP | 2.82 |      |      |
| NRSF | 2.81 |      |      |



|      |      |
|------|------|
| PLAG | 2.77 |
| PERO | 2.76 |
| ETSF | 2.67 |
| PBXC | 2.61 |
| P53F | 2.57 |
| NR2F | 2.48 |
| RBPF | 2.47 |
| MITF | 2.34 |
| TELO | 2.3  |
| MTF1 | 2.29 |
| DMTF | 2.25 |
| ZF47 | 2.23 |
| PAX3 | 2.11 |
| ZF04 | 2.08 |
| ZF38 | 2.08 |
| STAF | 2.07 |
| KOX8 | 2.06 |
| TEAF | 2.03 |

Supplementary Table 4

| Genomatix name  | motif                                                                              | UpLumPeaks                   |                  | UpBasPeaks                   |                  | Comments/source                                                            |
|-----------------|------------------------------------------------------------------------------------|------------------------------|------------------|------------------------------|------------------|----------------------------------------------------------------------------|
|                 |                                                                                    | 424 matrices with z>2        |                  | 363 matrices with z>2        |                  |                                                                            |
|                 |                                                                                    | Over representation (genome) | Z-Score (genome) | Over representation (genome) | Z-Score (genome) |                                                                            |
| V\$EREF         | weighted from 5 motifs below                                                       | <b>1.53</b>                  | <b>3.92</b>      | <b>1.28</b>                  | <b>1.83</b>      | Weighted family score                                                      |
| V\$ER.01        |   | 1.14                         | 0.5              | 1.21                         | 0.74             | 8 genomic binding sites                                                    |
| V\$ER.02        |   | 2.28                         | 4.36             | 1.3                          | 0.8              | 11 palindromic high affinity ERE binding sites<br>Estrogen gene activation |
| V\$ER.03        |   | 1.79                         | 3.52             | 1.79                         | 3.17             | 19 ChIP confirmed genomic binding sites;<br>Most close to HOMER sequence   |
| V\$ER.04        |   | 1.63                         | 2.71             | 1.7                          | 2.71             | 474 genomic binding sites identified by ChIP-seq approach                  |
| V\$ESR2.01      |   | 1.74                         | 3.05             | 1.67                         | 2.45             | ER-beta targets; 4148 genomic binding sites identified by ChIP-seq         |
| HOMER name      | motif                                                                              | Over representation (genome) | Z-Score (genome) | Over representation (genome) | Z-Score (genome) | Comments/source                                                            |
| ERE(NR) - HOMER |  | 1.52                         | 2.55             | 1.54                         | 2.34             | MCF7 ChIP                                                                  |

Supplementary Table 5

NCOR target list

Ingenuity Pathway Analysis (IPA, QIAGEN)

ATF3

AURKA

AXIN2

BCL6

BIRC3

BIRC5

BUB1B

BUB3

C3

CAV1

CCNA2

CCNB1

CCNB2

CCND1

CCNE2

CD44

CDCA3

CDH1

CDIPT

CDKN1A

CDKN2A

COL2A1

CXCL8

CYB5A

DBI

DHFR

DLGAP5

E2F1

ECT2

EGFR

EGR1

EHD1

EPB41L1

FOXM1

GADD45A

HES1

HMMR

IGFBP3

IGFBP3

IL1B

INSIG1

ISG15

ITGB4

JUN

JUP

KIF2C  
KISSER  
KLF6  
LCN2  
LGALS3BP  
LGR5  
MAPK8IP3  
MDM2  
ME1  
MT1E  
MT1X  
NEDD9  
OXTR  
PBK  
PLS3  
PMAIP1  
PPARG  
PSIP1  
RARA  
RGS10  
RRM2  
RUNX2  
S100A9  
SAT1  
SEMA6A  
SERPINE1  
SOX11  
SOX9  
SPTSSA  
SWAP70  
TOP2A  
TTK  
TYMS  
UCP3  
ZNF160

List of Western blots in **Breast cancer plasticity is restricted by a LATS1-NCOR1 repressive axis**

Fig S2D

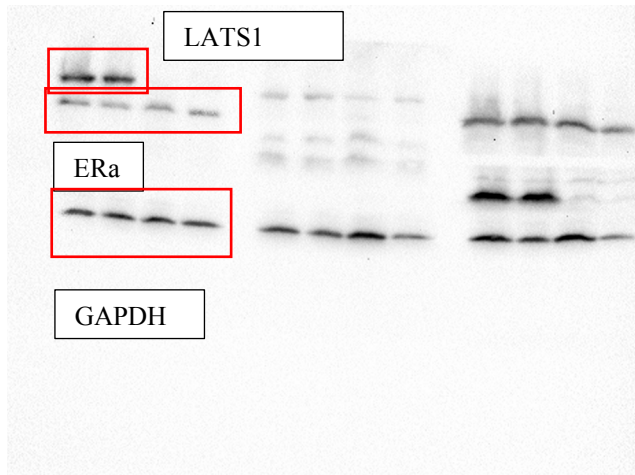

Fig S4A

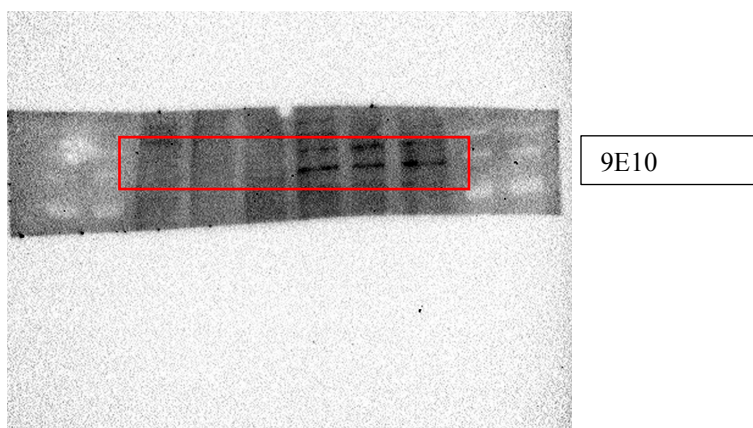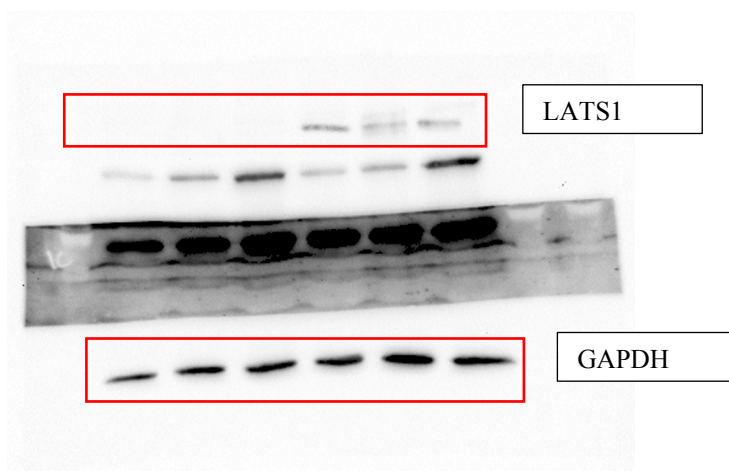

Fig S4B

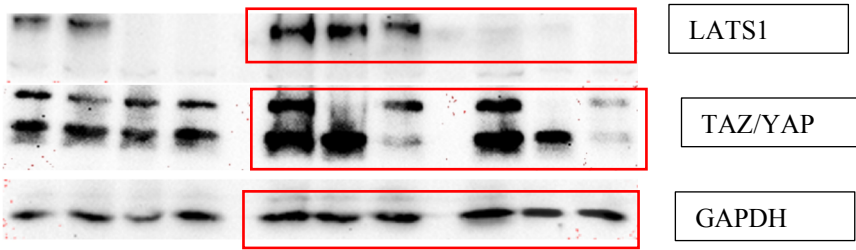

Fig S5D

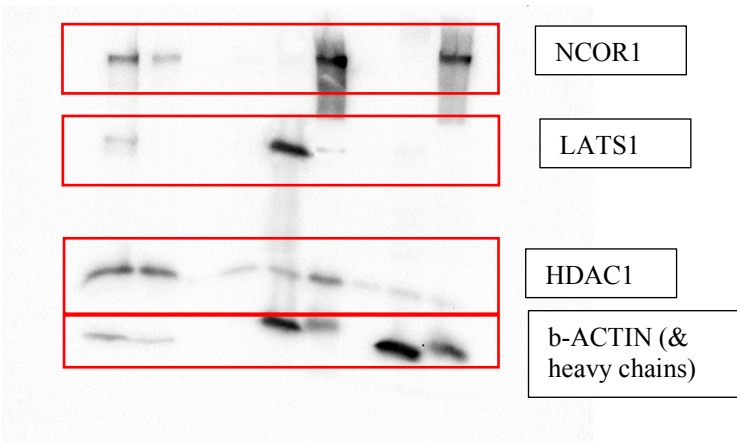

Fig S5E

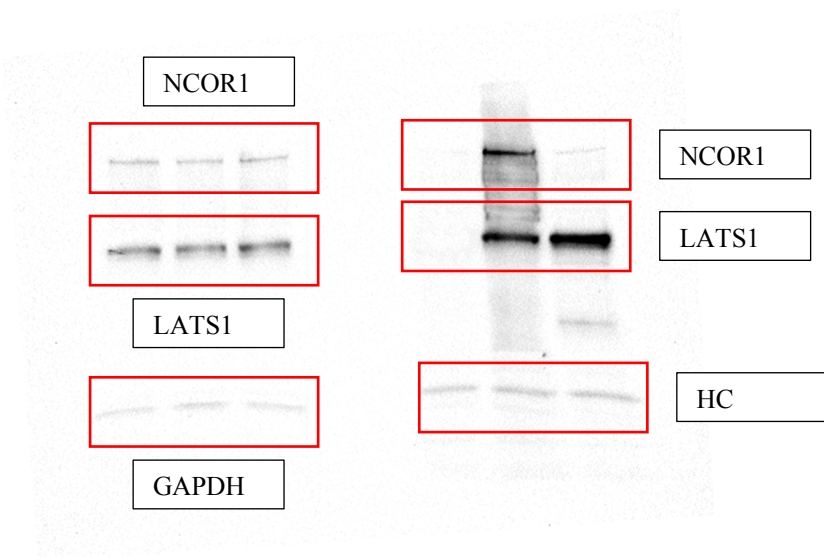

Fig S6C

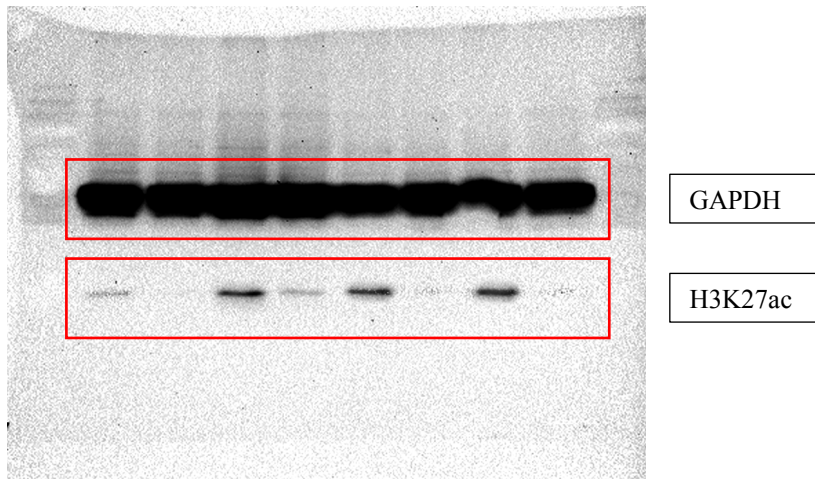

Supplement: 41467_2022_34863_MOESM1_ESM.pdf [file 41467_2022_34863_MOESM1_ESM.pdf]
